# Supplementary material for: mTOR inhibition and levels of the DNA repair protein MGMT in T98G glioblastoma cells
Source: PubMed Central journal article supplement (PMC4061125; doi:10.1186/1476-4598-13-144), 2014-06-08

Supplementary figures

1

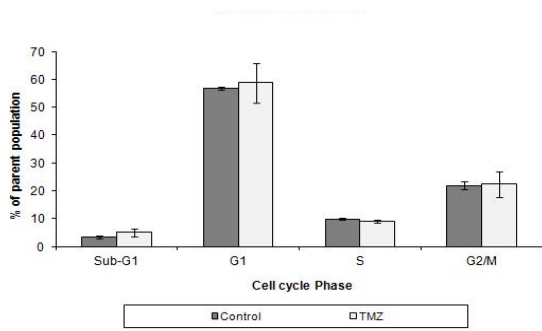

2

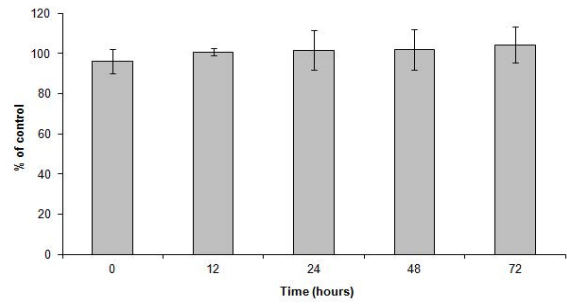

3

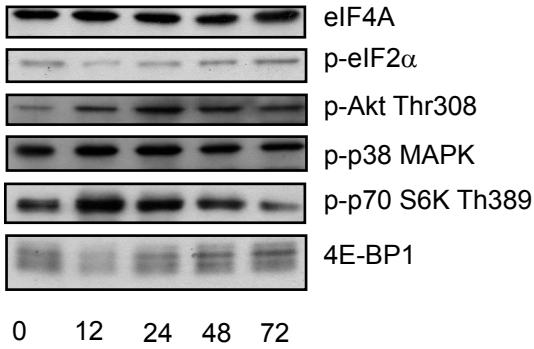

4

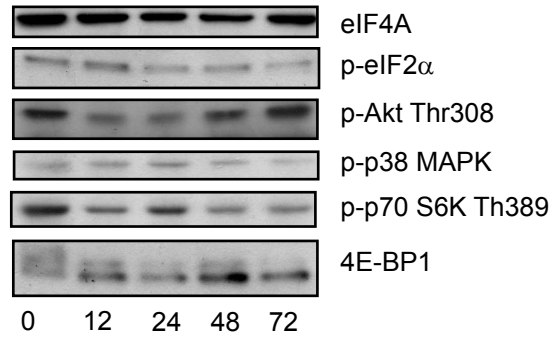

5

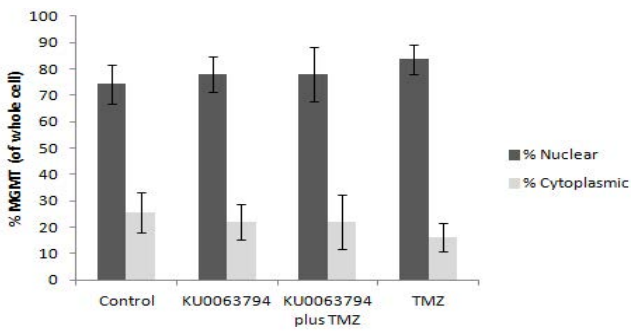

6

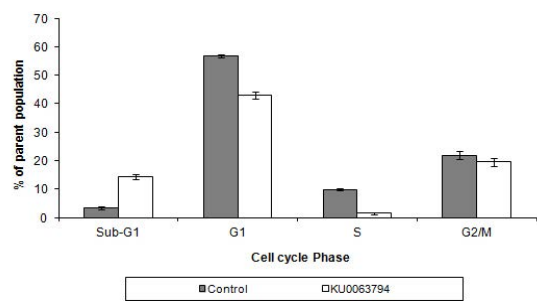

7

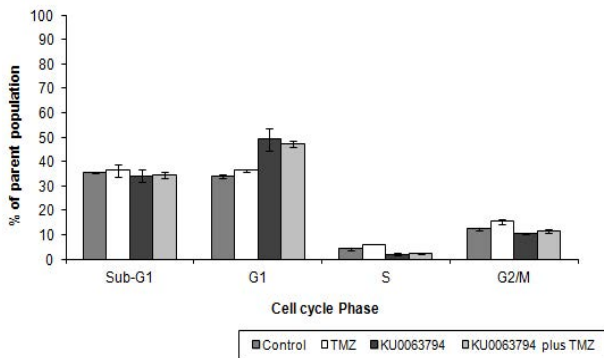

8

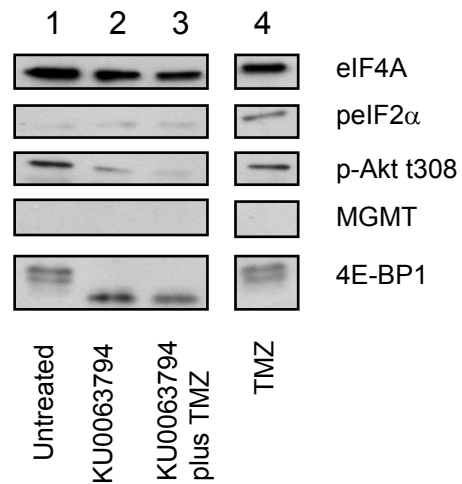

Supplement: 1476-4598-13-144-S1.pdf [file 1476-4598-13-144-S1.pdf]
